# Supplementary material
Source: PubMed Central journal article supplement (PMC3030398)
Supplement: supp_M110.189050_jbc.M110.189050-1.pdf [file supp_M110.189050_jbc.M110.189050-1.pdf]

Overlaid HSQC spectra of  $^{15}\text{N}$ -labeled ubiquitin in the absence and presence of Ube2g2

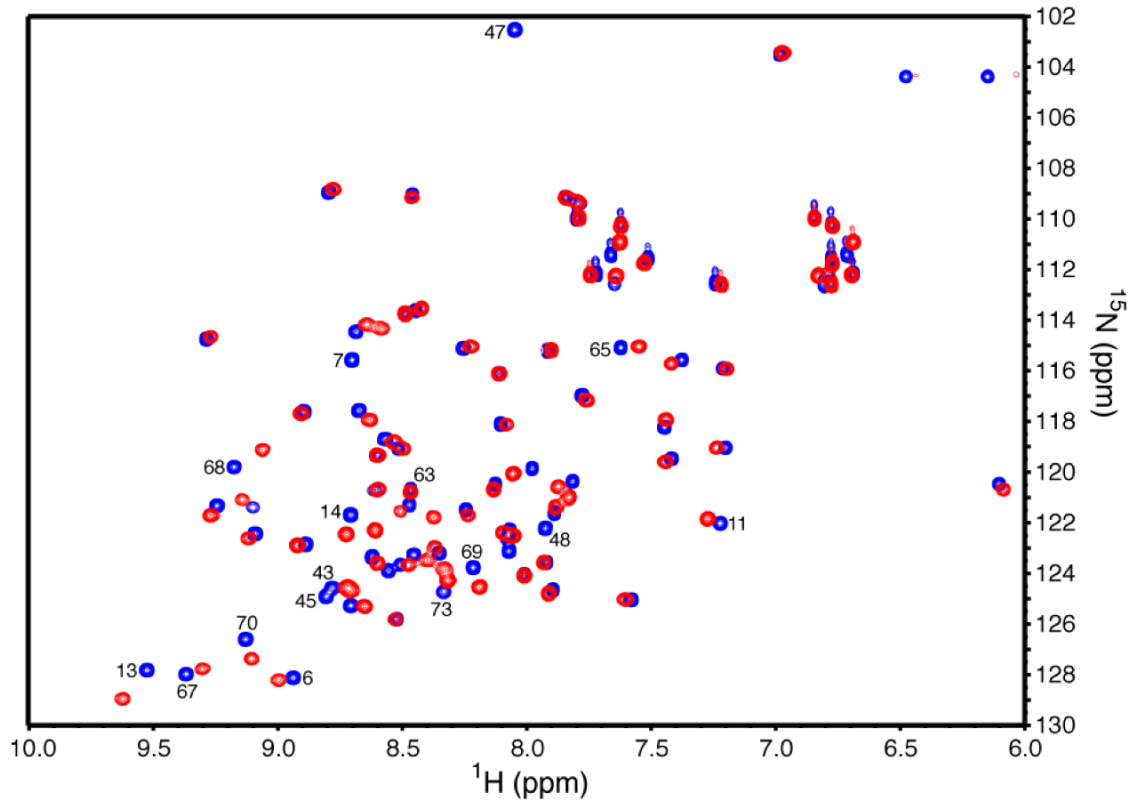

**Figure S1** Overlay of 2D [ $^{15}\text{N}$ ,  $^1\text{H}$ ]-HSQC spectra of  $^{15}\text{N}$ -labeled Ube2g2 (blue) and 50  $\mu\text{M}$   $^{15}\text{N}$ -labeled Ube2g2 in the presence of 540  $\mu\text{M}$  ubiquitin (red).
