# Supplementary material
Source: PubMed Central journal article supplement (PMC3030398)
Supplement: supp_M110.189050_jbc.M110.189050-2.pdf [file supp_M110.189050_jbc.M110.189050-2.pdf]

Table S1a. Best fit parameters for Ube2g2 to Ub/diUb binding

|                                       | Ubiquitin   | K48-diubiquitin | K63-diubiquitin |
|---------------------------------------|-------------|-----------------|-----------------|
| $K_d$                                 | $90 \pm 14$ | $47 \pm 5$      | $63 \pm 10$     |
| Ube2g2 observe                        |             |                 |                 |
| $c_{[Ub]}^a$                          | 0.69        | 0.68            | 0.67            |
| $\Delta\delta_{max}(\text{Ube2g2})^b$ |             |                 |                 |
| T17                                   | 0.0501      | ---             | 0.0593          |
| G23                                   | 0.1926      | 0.1840          | 0.1838          |
| I24                                   | 0.1245      | 0.1315          | 0.1166          |
| V25                                   | 0.1777      | ---             | 0.1547          |
| N33                                   | 0.0962      | 0.1048          | 0.0742          |
| E36                                   | 0.1138      | 0.1220          | 0.0867          |
| A39                                   | ---         | 0.0710          | ---             |
| L40                                   | 0.1091      | 0.1183          | 0.0986          |
| G43                                   | 0.0883      | 0.0604          | 0.0863          |
| E45                                   | 0.0286      | ---             | 0.0518          |
| D46                                   | 0.0698      | 0.0816          | 0.0620          |
| T47                                   | 0.0109      | ---             | 0.0138          |
| G52                                   | 0.1229      | 0.1415          | 0.1340          |
| V53                                   | 0.1269      | 0.1162          | 0.1264          |
| F54                                   | 0.1031      | 0.0783          | 0.0916          |
| I57                                   | ---         | ---             | 0.0932          |
| L58                                   | 0.0829      | 0.1239          | 0.0696          |
| T74                                   | ---         | 0.0988          | ---             |
| L163                                  | ---         | 0.0686          | ---             |
| G164                                  | 0.0879      | 0.0962          | 0.0770          |

a. correction factor for ubiquitin concentration (ie.  $[Ub] = c_{Ub} \times [Ub]_{nominal}$ ). b. expressed in ppm.

Table S1b. Best fit parameters for Ube2g2 to Ub/diUb binding (continued)

| Ub observe                                          | Ubiquitin | K48-diubiquitin |          | K63-diubiquitin |          |
|-----------------------------------------------------|-----------|-----------------|----------|-----------------|----------|
|                                                     |           | Distal          | Proximal | Distal          | Proximal |
| $c_{[^{15}\text{N-Ub}]}$ <sup>a</sup>               | 0.75      | 0.40            | 0.44     | 0.53            | 0.70     |
| $\Delta\delta_{\text{max}}(\text{Ub})$ <sup>b</sup> |           |                 |          |                 |          |
| Q2                                                  | ---       | ---             | ---      | ---             | 0.0498   |
| K6                                                  | 0.0851    | ---             | ---      | 0.0652          | ---      |
| T7                                                  | 0.2421    | 0.1824          | 0.0667   | 0.1779          | 0.1036   |
| L8                                                  | ---       | ---             | ---      | 0.0605          | ---      |
| K11                                                 | ---       | ---             | ---      | 0.0711          | 0.0377   |
| I13                                                 | 0.2102    | 0.1594          | 0.0420   | 0.1602          | 0.0510   |
| T14                                                 | 0.1092    | 0.0924          | ---      | 0.0783          | ---      |
| L15                                                 | 0.0779    | ---             | ---      | 0.0614          | ---      |
| I23                                                 | ---       | 0.0648          | 0.0546   | ---             | ---      |
| K29                                                 | 0.0863    | ---             | 0.0571   | 0.0657          | ---      |
| D32                                                 | 0.1135    | 0.0846          | 0.0428   | 0.0881          | 0.0512   |
| R42                                                 | 0.1296    | 0.0774          | 0.0366   | ---             | 0.0540   |
| L43                                                 | ---       | 0.0926          | 0.0794   | 0.0743          | 0.0569   |
| F45                                                 | ---       | 0.1688          | 0.0578   | ---             | ---      |
| G47                                                 | 0.6641    | ---             | ---      | ---             | 0.3059   |
| K48                                                 | ---       | ---             | 0.0644   | ---             | ---      |
| Q49                                                 | 0.1519    | 0.1528          | ---      | 0.1255          | 0.0919   |
| E51                                                 | 0.0763    | 0.0918          | 0.0617   | ---             | 0.0462   |
| T55                                                 | ---       | ---             | 0.0372   | ---             | ---      |
| Y59                                                 | ---       | ---             | 0.0378   | ---             | ---      |
| I61                                                 | ---       | ---             | ---      | ---             | 0.0422   |
| Q62                                                 | ---       | ---             | 0.0412   | ---             | 0.0392   |
| S65                                                 | 0.1039    | 0.1298          | 0.0469   | 0.0645          | 0.0598   |
| T66                                                 | 0.0806    | 0.0734          | ---      | ---             | ---      |
| L67                                                 | 0.1001    | 0.0804          | ---      | 0.0785          | 0.0695   |
| H68                                                 | 0.1886    | 0.1282          | ---      | 0.1644          | 0.1036   |
| L69                                                 | 0.1680    | 0.1346          | 0.0621   | 0.1376          | 0.0785   |
| V70                                                 | 0.1145    | 0.1399          | ---      | 0.0794          | 0.0449   |
| L71                                                 | 0.2616    | 0.2161          | 0.1542   | 0.2197          | 0.1302   |
| R72                                                 | ---       | ---             | ---      | ---             | 0.0400   |
| L73                                                 | ---       | ---             | 0.0553   | ---             | 0.0452   |
| R74                                                 | 0.0886    | 0.1134          | 0.0356   | 0.0598          | ---      |

a. correction factor for ubiquitin concentration (ie.  $[\text{Ub}] = c_{\text{Ub}} \times [\text{Ub}]_{\text{nominal}}$ ). b. expressed in ppm.
